# Supplementary material for: Michael addition of thiols, carbon nucleophiles and amines to dehydroamino acid and dehydropeptide derivativesElectronic supplementary information (ESI) available: experimental data for compounds 1–15. See http://www.rsc.org/suppdata/p1/b1/b106487h/
Source: Royal Society of Chemistry journal article supplement (doi:10.1039/b106487h), 2001-11-19
Supplement: b106487h.doc [file b106487h.doc]

**Supplementary** **data**

Michael addition of thiols, carbon nucleophiles and amines to dehydroamino acid and dehydropeptide derivatives

Paula M.T. Ferreira, Hernâni L.S. Maia*, Luís S. Monteiro and Joana Sacramento

*Department of Chemistry, University of Minho, Gualtar, P-4700-320 Braga, Portugal*

**1d, Boc-Ala(*N*-Boc,-benzylamino)-OMe:**  1.45 (18H, s, CH3 Boc), 3.42–3.52 (2H, m, CH2), 3.73 (3H, s, CH3 OMe), 4.34-4.55 (3H, comp. signal, CH + CH2 Bzl), 5.61 (1H, broad s, NH Bzl), 7.22–7.37 (5H, m, ArH Bzl); C 25.24, 44.46, 48.11, 49.42, 49.95, 76.71, 77.56, 124.30, 124.76, 125.53, 134.73, 152.34, 168.41.

**1e, Boc-Ala(*N*-Boc,-cyclohexylamino)-OMe:**  1.02-1.29 (4H, comp. signal, 2CH2 cyclohex.), 1.50 (18H, s, CH3 Boc), 1.57-1.88 (6H, comp. signal, 3CH2 cyclohex.), 2.41–2.48 (1H, m, CH cyclohex.), 2.99 (1H, dd, *J* 7.8 and 12.9, CH2), 3.40 (1H, dd, *J* 6.6 and 12.9, CH2), 3.72 (3H, s, CH3 OMe), 4.98 (1H, dd, *J* 6.6 and 7.8, CH); C 24.82, 24.89, 26.12, 27.86, 27.96, 33.35, 33.62, 46.04, 52.04, 55.45, 57.97, 83.14, 152.01, 170.88.

**1f, Boc-Ala[*N*-Boc,-(4-aminophenylthio)]-OMe:**  1.48 (18H, s, CH3 Boc), 3.31 (1H, dd, *J* 9.9 and 14.4, CH2), 3.55 (1H, dd, *J* 4.5 and 14.4, CH2), 3.69 (3H, s, CH3 OMe), 3.71 (2H, broad s, NH2), 5.03 (1H, dd, *J* 4.5 and 9.9, CH), 6.60 (2H, d, *J* 8.7, ArH), 7.28 (2H, d, *J* 8.7, ArH); C 27.94, 37.72, 52.31, 57.97, 83.12, 115.57, 122.74, 134.39, 146.26, 151.99, 170.39.

**1g, Boc-Ala[*N*-Boc,-bis(ethoxycarbonyl)methyl]-OMe:**  1.19–1.36 (6H, m, 2CH3 OEt), 1.49 (18H, s, CH3 Boc), 2.40–2.50 (1H, m, CH2), 2.75–2.85 (1H, m, CH2), 3.73 (3H, s, CH3 OMe), 4.15–4.28 (5H, m, 2CH2 OEt + CHmalonate), 5.03 (1H, dd, *J* 4.8 and 9.9, CH); C 13.99, 27.85, 48.87, 52.33, 56.09, 61.62, 63.48, 83.46, 151.67, 168.54, 169.14, 170.51.

**1h, Boc-Ala[*N*-Boc,-(1,3-cyclohexanedion-2yl)]-OMe:**  1.51 (18H, s, CH3 Boc), 1.93 (2H, m, -H dione), 2.39 (4H, broad signal, -H dione + -H dione), 2.81 (1H, dd, *J* 5.4 and 14.4, CH2), 3.08 (1H, dd, *J* 6.9 and 14.4, CH2), 3.76 (3H, s, CH3 OMe), 4.94 (1H, t, *J* 6.9, CH); C 20.49, 25.04, 27.92, 52.91, 57.99, 83.50, 111.77, 152.32, 174.26.

**1i, Boc-Ala{*N*-Boc,-[methoxycarbonyl-(1-oxoethyl)-methyl]}-OMe:**  1.46 (18H, s, CH3 Boc), 1.99 (3H, s, COCH3 acetoacetate) 2.90 (1H, dd, *J* 11.1 and 15.3, CH2), 3.01 (1H, dd, *J* 4.2 and 15.3, CH2), 3.74 (3H, s, CH3 OMe), 3.77 (3H, s, CH3 OMe), 5.04 (1H, dd, *J* 4.2 and 11.1, CH), 12.89 (1H, s, CH acetoacetate); C 18.58, 27.12, 27.88, 51.71, 52.11, 57.92, 83.08, 96.06, 152.15, 170.84, 173.24, 174.29.

**1j, Boc-Ala[*N*-Boc,-(2,4-pentanedion-3-yl)]-OMe:**  1.47 (18H, s, CH3 Boc), 2.14 (6H, s, 2CH3 dione), 3.03–3.06 (3H, m, CH2 + CH), 3.75 (3H, s, CH3 OMe), 4.95 (1H, dd, *J* 6.6 and 8.8, CH); C 26.28, 27.84, 27.92, 50.73, 52.59, 56.41, 58.12, 83.51, 83.66, 152.26, 168.23, 168.44, 170.06, 170.41.

**2a, Z-Ala(*N*-Boc,-phenylthio)-OMe**:  1.45 (9H, s, CH3 Boc), 3.54 (1H, dd, *J* 10.2 and 14.7, CH2), 3.71 (3H, s, CH3 OMe), 3.78 (1H, dd, *J* 4.8 and14.7, CH2), 5.17–5.28 (3H, m, CH2 Z + CH), 7.23–7.41 (10H, m, ArH Z + ArH thioph.); C 27.74, 34.65, 52.47, 58.09, 68.86, 83.90, 126.58, 128.26, 128.33, 128.44, 128.49, 128.95, 129.95, 135.02, 135.21, 151.04, 153.42, 169.77.

**2b, Z-Ala(*N*-Boc,-methoxycarbonylmethylthio)-OMe:**  1.45 (9H, s, CH3 Boc), 3.09–3.28 (4H, m, CH2 + CH2 thiol.), 3.66 (3H, s, CH3 OMe), 3.71 (3H, s CH3 OMe), 5.16 (1H, dd, *J* 5.1 and 9.3, CH), 5.24 (2H, d, *J* 1.8 CH2 Z), 7.34–7.39 (5H, m, ArH Z); C 27.70, 32.99, 41.04, 52.38, 52.39, 57.39, 68.94, 84.03, 128.23, 128.33, 128.40, 134.92, 151.08, 153.52, 169.53, 170.35.

**3a, Z(NO2)-Ala(*N*-Boc,-phenylthio)-OMe:**  1.44 (9H, s, CH3 Boc), 3.49 (1H, dd, *J* 10.5 and 13.8, CH2), 3.73 (3H, s, CH3 OMe), 3.76 (1H, dd, *J* 13.8 and 4.5, CH2), 5.19 (1H, dd, *J* 4.5 and 10.5, CH), 5.29 [2H, d, *J* 7.2, CH2 Z(NO2)], 7.19–7.35 (5H, m, ArH thioph.), 7.53 [2H, d, *J* 9.0, ArH Z(NO2)], 8.23 [2H, d, *J* 9.0, ArH Z(NO2)]; C 27.78, 34.46, 52.63, 58.24, 67.26,, 84.36, 123.71, 126.67, 128.18, 129.02, 129.79, 135.08, 142.43, 147.38, 150.48, 153.52, 169.55.

**3b, Z(NO2)-Ala(*N*-Boc,-methoxycarbonylmethylthio)-OMe:**  1.47 (9H, s, CH3 Boc), 3.11–3.30 (3H, m, CH2 + CH2 thiol), 3.44 (1H, dd, *J* 5.4 and 14.7, CH2), 3.72 (6H, s, 2CH3 OMe), 5.21 (1H, dd, *J* 5.4 and 9.9, CH), 5.36 [2H, s, CH2 Z(NO2)], 7.59 [2H, d, *J* 9.0, ArH Z(NO2)], 8.23 [2H, d, *J* 9.0, ArH Z(NO2)]; C 27.79, 32.56, 3316, 52.41, 52.61, 57.62, 67.62, 84.53, 123.72, 128.12, 142.41, 147.68, 150.51, 153.78, 169.40, 170.30.

**4a, Bz-Ala(*N*-Boc,-phenylthio)-OMe:**  1.14 (9H, s, CH3 Boc), 3.68–3.84 (5H, m, CH3 OMe + CH2), 5.25 (1H, dd, *J* 4.8 and 10.5, CH), 7.21–7.40 (10H, m, ArH thioph. + ArH Bz); C 27.10, 34.79, 52.56, 57.05, 83.68, 126.75, 127.81, 128.08, 128.98, 130.33, 131.20, 134.88, 137.18, 152.62, 169.79, 172.77.

**4b, Bz-Ala(*N*-Boc,-methoxycarbonylmethylthio)-OMe:**  1.15 (9H, s, CH3 Boc), 3.17-3.59 (4H, comp. signal, CH2 + CH2 thiol), 3.74 (3H, s, CH3 OMe), 3.78 (3H, s, CH3 OMe), 5.32 (1H, dd, *J* 4.8 and 10.8, CH), 7.39-7.68 (5H, comp. signal, ArH Bz); C 27.17, 32.30, 32.83, 52.35, 52.62, 56.19, 83.85, 127.81, 127.98, 131.25, 137.12, 152.64, 169.69, 170.37, 172.82.

**4h, Bz-Ala[*N*-Boc,-(1,3-cyclohexanedion-2-yl)]-OMe:**  1.45 (9H, s, CH3 Boc), 1.83–1.94 (2H, m, 5-H dione), 2.27–2.33 (2H, m, 4-H or 6-H dione), 2.45–2.49 (2H, m, 4-H or 6-H dione), 2.97 (1H, dd, *J* 6.6 and 14.6, CH2), 3.26 (1H, dd, *J* 6.6 and 14.6, CH2), 3.80 (3H, s, CH3 OMe), 5.19 (1H, t, *J* 6.6, CH), 7.41–7.59 (5H, m, ArH Bz), 8.87 (1H, s, 2-H dione).

**5a, Bz(NO2)-Ala(*N*-Boc,-phenylthio)-OMe:** H 1.19 (9H, s, CH3 Boc), 3.69–3.85 (5H, m, CH3 OMe + CH2), 5.29 (1H, dd, *J* 4.5 and 10.5, CH), 7.25–7.41 (5H, m, ArH thioph.), 7.74 [2H, d, *J* 9.0, ArH Bz(NO2)], 8.28 [2H, d, *J* 9.0, ArH Bz(NO2)]; C 27.33, 34.48, 52.79, 56.99, 84.91, 123.30, 126.98, 128.40, 129.14, 130.18, 134.46, 142.93, 148.93, 151.78, 169.35, 170.81.

**5b, Bz(NO2)-Ala(*N*-Boc,-methoxycarbonylmethylthio)-OMe:**  1.18 (9H, s, CH3 Boc), 3.16-3.40 (3H, comp. signal, CH2 + CH2 thiol), 3.54 (1H, dd, *J* 4.8 and 15.4, CH2), 3.74 (3H, s, CH3 OMe), 3.79 (3H, s, CH3 OMe), 5.36 (1H, dd, *J* 4.8 and 10.8, CH.), 7.81 [2H, d, *J* 9.0, ArH Bz(NO2)], 8.28 [2H, d, *J* 9.0, ArH Bz(NO2)]; C 27.34, 32.28, 32.52, 52.46, 52.82, 56.08, 85.07, 123.33, 128.44, 142.93, 148.98, 151.77, 169.24, 170.20, 170.89.

**6a, Tos-Ala(*N*-Boc,-phenylthio)-OMe:** H 1.29 (9H, s, CH3 Boc), 2.45 (3H, s, CH3 Tos), 3.48 (1H, dd, *J* 9.3 and 14.6, CH2), 3.76 (3H, s, CH3 OMe), 3.87 (1H, dd, *J* 4.8 and 14.6, CH2), 5.26 (1H, dd, *J* 9.3 and 4.8, CH), 7.23–7.36 (5H, m, ArH thioph.), 7.48 (2H, d, *J* 8.4, ArH Tos), 7.94 (2H, d, *J* 8.4, ArH Tos); C 21.57, 27.68, 35.17, 52.67, 58.67, 85.25, 126.73, 128.84, 128.88, 128.99, 130.38, 135.22, 136.56, 144.30, 149.92, 169.46.

**6d, Tos-Ala(*N*-Boc,-benzylamino)-OMe:**  1.45 (9H, s, CH3 Boc), 2.42 (3H, s, CH3 Tos), 3.45–3.53 (5H, m, CH2 + CH3 OMe), 4.12–4.19 (1H, m, CH), 4.32–4.51 (2H, m, CH2 Bzl), 5.70 (1H, broad s, NH Bzl), 7.19–7.35 (7H, m, ArH Tos + ArH Bzl), 7.70 (2H, d, *J* 8.4, ArH Tos); C 21.50, 28.25, 48.69, 51.72, 52.68, 54.92, 80.89, 127.14, 127.27, 127.38, 128.59, 129.60, 136.80, 137.58, 143.52, 156.30, 170.47.

**6e, Tos-Ala(*N*-Boc,-cyclohexylamino)-OMe:**  1.30 (9H, s, CH3 Boc), 1.67-1.95 (10H, comp. signal, 5CH2 cyclohex.), 2.45 (3H, s, CH3 Tos), 2.50–2.59 (1H, m, CH cyclohex.), 3.12 (1H, dd, *J* 7.8 and 13.2, CH2), 3.49 (1H, dd, *J* 5.7 and 13.2, CH2), 3.73 (3H, s, CH3 OMe), 5.20 (1H, dd, *J* 5.7 and 7.8, CH), 7.31 (2H, d, *J* 8.4, ArH Tos), 7.99 (2H, d, *J* 8.4, ArH Tos); C 21.45, 24.89, 26.12, 27.86, 27.96, 33.35, 33.62, 46.04, 52.04, 55.45, 57.97, 83.14, 126.37, 127.20, 129.00, 143.30, 152.01, 170.88.

**6g, Tos-Ala[*N*-Boc,-bis(ethoxycarbonyl)-methyl]-OMe:**  1.23 (6H, t, *J* 7.2, 2CH3 OEt), 1.28 (9H, s, CH3 Boc), 2.44 (3H, s, CH3 Tos), 3.89 (3H, s, CH3 OMe), 4.15–4.28 (5H, m, 2CH2 OEt + CH2), 4.61–4.66 (2H, m, CH2 + CH), 5.95 (1H, s, CH malonate), 7.32 (2H, d, *J* 8.1, ArH Tos), 7.76 (2H, d, *J* 8.1, ArH Tos); C 13.87, 13.91, 21.60, 27.99, 53.67, 56.54, 56.83, 59.92, 61.72, 62.05, 80.34, 128.26, 129.75, 137.42, 144.51, 153.45, 165.99, 166.11, 168.78.

**6h, Tos-Ala[*N*-Boc,-(1,3-cyclohexanedion-2-yl)]-OMe:**  1.35 (9H, s, CH3 Boc), 1.94–2.02 (2H, m, 5-H dione), 2.43 (3H, s, CH3 Tos), 2.46–2.52 (4H, m, 4-H dione + 6-H dione), 2.91 (1H, dd, *J* 6.3 and 14.2, CH2), 3.10 (1H, dd, *J* 6.3 and 4.2,  CH2), 3.79 (3H, s, CH3 OMe), 5.10 (1H, t, *J* 6.3, CH), 7.33 (2H, d, *J* 8.1, ArH Tos), 8.06 (2H, d, *J* 8.1, ArH Tos), 8.75 (1H, broad s, 2-H dione); C 15.22, 20.41, 21.61, 22.62, 24.40, 27.76, 31.55, 53.10, 58.43, 85.11, 111.79, 128.57, 129.08, 136.88, 144.16, 150.55, 173.29.

**6k, Tos-Ala(*N*-Boc,-imidazol-1-yl)-OMe:**  1.32 (9H, s, CH3 Boc), 2.43 (3H, s, CH3 Tos), 3.81 (3H, s, CH3 OMe), 4.58 (1H, dd, *J* 8.4 and 15.0, CH2), 4.77 (1H, dd, *J* 5.1 and 15.0, CH2), 5.40 (1H, dd, *J* 8.4 and 5.1, CH), 7.04 (1H, s, 4-H or 5-H imid.), 7.11 (1H, s, 4-H or 5-H imid.), 7.25 (2H, d, *J* 8.4, ArH Tos), 7.48 (1H, s, 2-H imid.), 7.53 (2H, d, *J* 8.4, ArH Tos); C 21.62, 27.75, 46.51, 52.96, 59.13, 86.04, 119.53, 128.42, 129.17, 129.91, 136.00, 137.86, 144.74, 150.15, 168.21.

**6l, Tos-Ala[*N*-Boc,-(3-formylindol)-1-yl]-OMe:**  1.33 (9H, s, CH3 Boc), 2.39 (3H, s, CH3 Tos), 3.84 (3H, s, CH3 OMe), 4.81 (1H, dd, *J* 8.4 and 15.0, CH2), 5.04 (1H, dd, *J* 5.4 and 15.0, CH2), 5.55 (1H, dd, *J* 8.4 and 5.4, CH), 7.10 (2H, d, *J* 8.1, ArH Tos), 7.33–7.49 (5H, m, 5-H + 6-H *+* 7-H ind. + 2H ArH Tos), 7.73 (1H, s, 2-H ind.), 8.33–8.36 (1H, m, 4-H ind.), 9.94 (1H, s, CHO ind.); C 21.58, 27.74, 46.75, 53.04, 57.89, 86.15, 109.82, 118.97, 122.41, 123.20, 124.47, 125.36, 128.20, 129.05, 135.59, 137.18, 139.44, 144.78, 150.28, 168.40, 184.59.

**6m, Tos-Ala(*N*-Boc,-pyrazol-1-yl)-OMe:**  1.32 (9H, s, CH3 Boc), 2.43 (3H, s, CH3 Tos), 3.81 (3H, s, CH3 OMe), 4.72 (1H, dd, *J* 9.3 and 14.7, CH2), 5.02 (1H, dd, *J* 4.8 and 14.7, CH2), 5.67 (1H, dd, *J* 4.8 and 9.3, CH), 6.28 (1H, t, *J* 2.1, 4-H pyr.), 7.24 (2H, d, *J* 8.4, ArH Tos), 7.43 (1H, d, *J* 2.1, 3-H or 5-H pyr.), 7.60 (1H, d, *J* 2.1, 3-H or 5-H pyr.), 7.68 (2H, d, *J* 8.4, ArH Tos); C 21.61, 27.76, 51.43, 52.83, 59.09, 85.53, 105.90, 128.56, 128.99, 130.51, 136.39, 140.32, 144.36, 150.08, 168.60.

**6n, Tos-Ala[*N*-Boc,(-1,2,4-triazol-1-yl)]-OMe:** H 1.35 (9H, s, CH3 Boc), 2.48 (3H, s, CH3 Tos), 3.85 (3H, s, CH3 OMe), 4.81 (1H, dd, *J* 8.1 and 14.4, CH2), 5.07 (1H, dd, *J* 5.1 and 14.4, CH2), 5.67 (1H, dd, *J* 5.1 and 8.1, CH), 7.32 (2H, d, *J* 8.4, ArH Tos), 7.77 (2H, d, *J* 8.4, ArH Tos), 8.04 (1H, s, 3-H or 5-H triaz.), 8.15 (1H, s, 3-H or 5-H triaz); C 21.59, 27.69, 49.11, 52.96, 58.21, 86.00, 128.44, 129.09, 136.07, 144.29, 144.72, 150.04, 152.45, 168.11.

**7a, Tos-Gly(*N*-Boc)-Ala(*N*-Boc,-phenylthio)-OMe:**  1.36 (9H, s, CH3 Boc), 1.47 (9H, s, CH3 Boc), 2.47 (3H, s, CH3 Tos), 3.44 (1H, dd, *J* 9.9 and 14.6, CH2 Ala), 3.75 (3H, s, CH3 OMe), 3.82 (1H, dd, *J* 4.8 and 14.6, CH2 Ala), 5.22 (2H, d, *J* 8.7, CH2 Gly), 5.45 (1H, dd, *J* 9.9 and 4.8, CH Ala), 7.23–7.34 (5H, m, ArH tioph.), 7.42 (2H, d, *J* 8.1, ArH Tos), 7.95 (2H, d, *J* 8.1, ArH Tos); C 21.61, 27.73, 33.88, 51.47, 52.47, 55.90, 84.43, 85.26, 126.47, 128.76, 128.93, 129.07, 129.63, 135.37, 136.74, 144.11, 150.46, 151.35, 169.58, 170.56.

**7b, Tos-Gly(*N*-Boc)-Ala(*N*-Boc,-methoxycarbonylmethylthio)-OMe:**  1.31 (9H, s, CH3 Boc), 1.51 (9H, s, CH3 Boc), 2.42 (3H, s, CH3 Tos), 3.04 (1H, dd, *J* 9.3 and 10.5, CH2 Ala), 3.12–3.30 (2H, m, CH2 thiol), 3.46 (1H, dd, *J* 3.3 and 10.5, CH2 Ala), 3.70 (3H, s, CH3 OMe), 3.72 (3H, s, CH3 OMe), 5.18 (2H, q, *J* 15.0, CH2 Gly), 5.46 (1H, dd, *J* 3.3 and 9.3, CH Ala), 7.28 (2H, d, *J* 8.1, ArH Tos), 7.88 (2H, d, *J* 8.1, ArH Tos); C 21.52, 27.66, 27.77, 32.12, 33.06, 51.43, 52.26, 52.40, 55.05, 84.41, 85.41, 128.60, 128.90, 136.75, 144.12, 150.41, 151.24, 169.45, 170.39, 170.61.

**7d, Tos-Gly(*N*-Boc)-Ala(*N*-Boc,-benzylamino)-OMe:**  1.31 (9H, s, CH3 Boc), 1.44 (9H, s, CH3 Boc), 2.44 (3H, s, CH3 Tos), 3.56–3.62 (1H, m, CH2 Ala), 3.73 (3H, s, CH3 OMe), 3.96–4.03 (1H, m, CH2 Ala), 4.50–4.78 (5H, m, CH2 Gly + CH2 Bzl + CH Ala), 5.60 (1H, d, *J* 7.5, NH), 7.23–7.42 (7H, m, ArH Tos + ArH Bzl), 8.00 (2H, d, *J* 8.7, ArH Tos); C 21.62, 27.78, 28.23, 43.57, 46.88, 48.85, 50.96, 52.60, 84.53, 85.16, 126.37, 127.93, 128.05, 128.47, 128.93, 129.16, 135.20, 136.66, 144.16, 144.63, 150.48, 167.48, 168.91, 171.12.

**7h, Tos-Gly(*N*-Boc)-Ala[*N*-Boc,-(1,3-cyclohexanedion-2-yl)]-OMe:**  1.20 (9H, s, CH3 Boc), 1.46 (9H, s, CH3 Boc), 1.71–1.75 (2H, m, 5-H dione), 1.98–2.17 (4H, m, 4-H dione + 6-H dione), 2.41 (3H, s, CH3 Tos), 2.76 (1H, dd, *J* 3.6 and 13.5, CH2 Ala), 2.92 (1H, dd, *J* 11.1 and 13.5, CH2 Ala), 3.65 (3H, s, CH3 OMe), 4.96 (2H, q, *J* 18.9, CH2 Gly), 5.30 (1H, dd, *J* 3.6 and 11.1, CH Ala), 7.43 (2H, d, *J* 8.1, ArH Tos), 7.81 (2H, d, *J* 8.1, ArH Tos), 10.67 (1H, broad, 2-H dione); C 20.17, 21.07, 21.61, 27.27, 27.38, 51.31, 52.07, 54.03, 83.95, 84.10, 109.63, 127.87, 129.35, 136.68, 144.41, 146.96, 151.37, 169.75, 170.38.

**8a, Boc-∆Ala(-phenylthio)-OMe:** *E*-isomer:  1.52 (9H, s, CH3 Boc), 3.80 (3H, s, CH3 OMe), 6.26 (1H, broad s, NH), 7.32–7.39 (3H, m, ArH), 7.46–7.50 (3H, m, ArH + CH); C 28.16, 52.46, 81.07, 122.35, 128.05, 129.30, 131.00, 134.23, 152.45, 163.59. *Z*-isomer:  1.47 (9H, s, CH3 Boc), 3.91 (3H, s, CH3 OMe), 6.73 (1H, broad s, NH), 7.26–7.39 (3H, m, ArH), 7.51–7.54 (2H, m, ArH), 7.97 (1H, broad s, CH); C 28.26, 52.43, 80.60, 119.58, 127.62, 129.27, 130.35, 136.44, 152.89, 163.43.

**8b, Boc-∆Ala(-methoxycarbonylthio)-OMe:**  1.46 (9H, s, CH3 Boc), 3.48 (2H, s, CH2 thiol.), 3.75 (3H, s, CH3 OMe), 3.78 (3H, s, CH3 OMe), 6.21 (1H, broad s, NH), 7.32 (1H, s, CH); C 28.09, 35.58, 52.48, 52.73, 81.03, 122.77, 132.57, 163.31, 169.33, 169.48.

**8c, Boc-∆Ala(-octanylthio)-OMe:**  0.88 (3H, t, *J* 6.6, thiol), 1.27 (10H, complex signal, thiol), 1.48 (9H, s, CH3 Boc), 1.60–1.72 (2H, m, thiol), 2.80 (2H, t, *J* 7.5, CH2 thiol), 3.78 (3H, s, CH3 OMe), 5.97 (1H, broad s, NH), 7.34 (1H, s, CH); C 14.03, 22.57, 28.13, 28.44, 29.01, 29.06, 30.42, 31.71, 34.77, 52.18, 80.65, 121.43, 128.90, 137.29, 163.57.

**9i, 2-(*tert*-bytyloxycarbonylamino)-2,4-bis(methoxycarbonyl)-5-methyl-2,3-dihydrofuran:**  1.44 (9H, s, CH3 Boc), 2.24 (3H, s, C2-CH3), 3.16 (2H, q, -*J* 15.9, CH2), 3.69 (3H, s, CH3 OMe), 3.83 (3H, s, CH3 OMe), 5.93 (1H, broad s, NH): C 28.09, 39.74, 50.96, 53.44, 81.35, 91.22, 100.80,153.21, 165.33, 166.60, 168.77.

**9j, 2-(*tert*-bytyloxycarbonylamino)-2-methoxycarbonyl-4-(1-oxoethyl)-5-methyl-2,3-dihydrofuran:**  1.45 (9H, s, CH3 Boc), 2.23 (3H, s, C2-CH3), 2.29 (3H, s, CH3-C=O), 3.23 (2H, q, -*J* 15.7, CH2), 3.84 (3H, s, CH3 OMe), 5.93 (1H, broad s, NH): C 14.84, 28.01, 40.23, 53.37, 81.27, 91.04, 111.29,153.28, 165.73, 168.70, 193.44.

**10k, Boc-Abu[*N*-Boc,-(imidazol-1-yl)]-OMe:** Fraction melting at 81.5–83.5 °C: H 1.41 (18H, s, CH3 Boc), 1.73 (3H, d, *J* 6.3, CH3), 3.75 (3H, s, CH3 OMe), 4.94–5.02 (1H, m, CH), 5.08 (1H, d, *J* 9.3, CH), 6.85 (1H, s, 4-H or 5-H imid.), 6.98 (1H, s, 4-H or 5-H imid.), 7.38 (1H, s, 2-H imid.); C 21.14, 27.83, 52.15, 52.44, 61.58, 83.88, 117.41, 129.02, 137.07, 152.03, 169.22. Fraction melting at 82.5–84.5 °C: H 1.42 (3H, d, *J* 6.6, CH3), 1.54 (18H, s, CH3 Boc), 3.68 (3H, s, CH3 OMe), 5.03–5.12 (2H, m, CH + CH), 7.06 (1H, s, 4-H or 5-H imid.), 7.07 (1H, s, 4-H or 5-H imid.), 7.70 (1H, s, 2-H imid.); C 18.12, 27.95, 52.48, 52.82, 61.47, 84.23, 116.62, 129.46, 137.32, 151.91, 169.18.

**10l, Boc-Abu[*N*-Boc,-(3-formylindol-yl)]-OMe:** Fraction melting at 109–111 °C: H 1.23 (18H, s, CH3 Boc), 1.87 (3H, d, *J* 6.9, CH3), 3.78 (3H, s, CH3 OMe), 5.25 (1H, d, *J* 9.3, CH), 5.36–5.43 (1H, m, CH), 7.24–7.27 (2H, m, 5-H and 6-H ind.), 7.42–7.45 (1H, m, 7-H ind.), 7.76 (1H, s, 2-H ind.), 8.25–8.28 (1H, m, 4-H ind.), 9.95 (1H, s, CHO ind.); C 20.90, 27.66, 30.29, 61.60, 65.82, 83.91, 110.93, 121.83, 122.81, 123.88, 136.63, 152.22, 169.15, 184.74. Fraction melting at 145–147 °C: H 1.55–1.60 (21H, m, CH3 Boc + CH3), 3.61 (3H, s, CH3 OMe), 5.38–5.52 (2H, m, CH + CH), 7.27–7.36 (2H, m, 5-H and 6-H ind.), 7.64 (1H, d, *J* 7.8, 7-H ind.), 7.97 (1H, s, 2-H ind.), 8.32 (1H, d, *J* 7.2, 4-H ind.), 10.03 (1H, s, CHO ind.); C 17.29, 27.93, 52.48, 53.29, 59.81, 84.34, 110.98, 118.72, 122.24, 122.88, 123.89, 125.55, 136.42, 137.79, 152.15, 169.16, 184.73.

**10n, Boc-Abu[*N*-Boc,-(1,2,4-triazol-1-yl)]-OMe:** Fraction melting at 84–85 °C: H 1.41 (18H, s, CH3 Boc), 1.80 (3H, d, *J* 6.3, CH3), 3.74 (3H, s, CH3 OMe), 5.17–5.19 (2H, m, CH + CH), 7.88 (1H, s, 3-H or 5-H triaz.), 7.99 (1H, s, 3-H or 5-H triaz.); C 19.91, 27.76, 52.44, 54.82, 61.30, 83.65, 143.52, 151.82, 169.10. Fraction melting at 108–110 ° C: H 1.46 (3H, d, *J* 6.9, CH3), 1.54 (18H, s, CH3 Boc), 3.64 (3H, s, CH3 OMe), 5.19–5.30 (1H, m, CH), 5.51 (1H, d, *J* 8.7, CH), 7.94 (1H, s, 3-H or 5-H triaz.), 8.24 (1H, s, 3-H or 5-H triaz.); C 17.36, 27.90, 52.38, 55.33, 59.79, 84.10, 144.01, 151.83, 151.99, 169.47.

**11, Bz-Abu(*N*-Boc)-OMe:**  1.23 (9H, s, CH3 Boc), 1.84 (3H, d, *J* 6.9,  CH3), 3.78 (3H, s, CH3 OMe), 7.14 (1H, q, *J* 6.9, CH), 7.41–7.53 (3H, m, ArH Bz), 7.71–7.74 (2H, m, ArH Bz); C 13.68, 27.32, 52.30, 83.51, 127.97, 128.08, 130.00, 131.49, 136.50, 138.83, 151.91, 164.02, 171.69.

**11b, Bz-Abu(*N*-Boc,-methoxycarbonylmethylthio)-OMe:** Fraction melting at 60–61 °C: H 1.15 (9H, s, CH3 Boc), 1.66 (3H, d, *J* 6.6, CH3), 3.31 (2H, s, CH2 thiol), 3.67 (3H, s, CH3 OMe), 3.76 (3H, s, CH3 OMe), 3.77–3.91 (1H, m, CH), 4.97 (1H, d, *J* 9.3, CH), 7.37–7.69 (5H, m, ArH Bz); C 20.99, 27.19, 32.13, 41.47, 52.33, 52.52, 61.38, 83.88, 127.79, 131.21, 137.06, 152.69, 169.47, 170.73, 172.67. Oily fraction: H 1.46 (9H, s, CH3 Boc), 1.37 (3H, d, *J* 7.2, CH3), 3.75 (2H, s, CH2 thiol), 3.77 (3H, s, CH3 OMe), 3.78–3.94 (1H, m, CH), 3.94 (3H, s, CH3 OMe), 4.83 (1H, d, *J* 5.7, CH), 7.34–7.68 (5H, m, ArH Bz); C 18.00, 27.20, 32.92, 40.91, 52.33, 52.46, 60.53, 84.00, 127.95, 128.12,m 131.49, 136.99, 152.70, 169.49, 170.87, 172.71.

**11n, Bz-Abu[*N*-Boc,-(1,2,4-triazol-1-yl)]-OMe:** Fraction melting at 108–109.5 °C: H 1.03 (9H, s, CH3 Boc), 1.86 (3H, d, *J* 6.6, CH3), 3.79 (3H, s, CH3 OMe), 5.43–5.46 (2H, m, CH + CH), 7.11-7.46 (5H, m, ArH Bz), 7.88 (1H, s, 3-H or 5-H triaz.), 8.13 (1H, s, 3-H or 5-H triaz.); C 20.48, 27.05, 52.76, 54.87, 61.02, 84.26, 127.91, 127,94, 131.42, 136.36, 143.86, 152.18, 152.36, 168.86, 172.46.  Fraction melting at 79.5–81.5 °C:H 1.18 (9H, s, CH3 Boc), 1.57 (3H, d, *J* 7.2, CH3), 3.66 (3H, s, CH3 OMe), 5.39–5.49 (1H, m, CH), 5.67 (1H, d, *J* 8.7, CH), 7.42-7.64 (5H, m, ArH Bz), 7.97 (1H, s, 3-H or 5-H triaz.), 8.29 (1H, s, 3-H or 5-H triaz.); C 17.87, 27.20, 52.63, 55.13, 59.75, 85.60, 127.72, 128.19, 131.67, 136.50, 143.99, 152.03, 152.71, 169.05, 172.76.

**12k, Boc-∆Abu[-(imidazol-1-yl)]-OMe:** *E*-isomer:  1.47 (9H, s, CH3 Boc), 2.21 (3H, s, CH3), 3.56 (3H, s, CH3 OMe), 6.59 (1, broad s, NH), 6.90 (1H, s, 4-H or 5-H imid.), 7.09 (1H, s, 4-H or 5-H imid.), 7.46 (1H, s, 2-H imid.); C 20.18, 28.07, 52.47, 81.70, 103.98, 118.89, 129.55, 136.96, 152.87, 164.17. *Z*-isomer:  1.40 (9H, s, CH3 Boc), 2.40 (3H, s, CH3), 3.86 (3H, s, CH3 OMe), 6.09 (1, broad s, NH). 7.03 (1H, s, 4-H or 5-H imid.), 7.12 (1H, s, 4-H or 5-H imid.), 7.63 (1H, s, 2-H imid.); C 19.70, 27.99, 52.54, 81.58, 104.06, 118.21, 121.68, 129.76, 136.39, 152.77, 164.88.

**12l, Boc-∆Abu[-(3-formylindol-1-yl)]-OMe:** *E*-isomer: H 1.52 (9H, s, CH3 Boc), 2.32 (3H, s, CH3), 3.32 (3H, s, CH3 OMe), 6.46 (1H, s, NH), 7.22-7.35 (3H, m, 5-H + 6-H + 7-H ind.), 7.71 (1H, s, 2-H ind.), 8.29–8.32 (1H, m, 4-H ind.), 10.02 (1H, s, CHO); C 19.87, 28.14, 52.55, 81.85, 110.70, 119.71, 122.13, 122.31, 123.25, 123.65, 124.60, 124.87, 137.51, 138.22, 152.60, 163.52, 184.89. *Z*-isomer: H 1.32 (9H, s, CH3 Boc), 2.45 (3H, s, CH3), 3.93 (3H, s, CH3 OMe), 5.86 (1H, s, NH), 7.22–7.25 (1H, m, 5-H or 6-H or 7-H ind.), 7.34–7.37 (2H, m, 5-H or 6-H or 7-H ind.), 7.75 (1H, s, 2-H ind.), 8.30–8.33 (1H, m, 4-H ind.), 10.05 (1H, s, CHO); C 19.46, 27.90, 52.62, 81.47, 111.45, 120.25, 122.24, 123.61, 124.88, 125.29, 129.67, 135.55, 137.05, 152.59, 164.67, 184.65.

**13, Tos-Phe(*N*-Boc)-OMe:**  1.28 (9H, s, CH3 Boc), 2.44 (3H, s, CH3 Tos), 3.83 (3H, s, CH3 OMe), 7.27 (2H, d, *J* 8.1, ArH Tos), 7.38–7.41 (3H, m, ArH ∆Phe), 7.66–7.69 (2H, m, ArH ∆Phe), 7.88 (1H, s, CH), 7.92 (2H, d, *J* 8.1, ArH Tos); C 21.65, 27.68, 52.54, 84.44, 123.97, 128.78, 128.85, 129.74, 130.26, 130.67, 132.37, 135.91, 141.95, 144.59, 149.73, 165.17.

**13k, Boc-∆Phe[-(imidazol-1-yl)]-OMe:** Fraction melting at 164–165.5 °C: H 1.45 (9H, s, CH3 Boc), 3.60 (3H, s, CH3OMe), 6.36 (1, broad s, NH), 6.95 (1H, s, 4-H or 5-H imid.), 7.15-7.41 (6H, m, ArH ∆Phe + 4-H or 5-H imid.), 7.53 (1H, s, 2-H imid.); C 28.03, 52.45, 82.00, 119.72, 128.51, 128.59, 129.92, 134.57, 138.04, 152.34, 165.16. Fraction melting at 142–144 °C: H 1.46 (9H, s, CH3 Boc), 3.65 (3H, s, CH3 OMe), 6.86 (1H, s, 4-H or 5-H imid.), 7.10 (1H, s, 4-H or 5-H imid.), 7.26-7.44 (5H, comp. signal, ArH ∆Phe), 7.49 (1H, s, 2-H imid.); C 28.02, 52.63, 81.94, 124.34, 128.61, ,129.12, 129.67, 130.09, 133.52, 138.16, 152.42, 164.65.

**13l, Boc-∆Phe[-(3-formylindol-1-yl)]-OMe:** Fraction melting at 168–170 °C:  1.38 (9H, s, CH3 Boc), 3.67 (3H, s, CH3 OMe), 7.14-7.45 (9H, comp. signal, ArH ∆Phe + 5-H ind.*,* 6-H ind., 7-H ind. + NH), 7.45 (1H, s, 2-H ind.), 8.20 (1H, dd, *J* 2.4 and 5.9, 4-H ind.), 9.40 (1H, s, CHO); C 27.96, 52.52, 81.54, 112.09, 120.19, 122.18, 123.74, 124.60, 124.93, 128.35, 128.71, 129.28, 129.88, 134.97, 136.33, 139.23, 152.70, 165.22, 184.50. Fraction melting at 193–195 °C:  1.45 (9H, s, CH3 Boc), 3.38 (3H, s, CH3 OMe), 6.52 (1H, broad s, NH), 7.07-7.41 (8H, comp. signal, ArH ∆Phe + 5-H ind.*,* 6-H ind., 7-H ind.), 7.68 (1H, s, 2-H ind.), 8.29 (1H, d, *J* 7.8, 4-H ind.), 10.00 (1H, s, CHO); C 25.01, 49.62, 79.25, 108.35, 117.03, 119.06, 120.40, 121.66, 121.91, 123.33, 125.42, 125.75, 126.32, 127.23, 130.52, 135.34, 136.45, 149.31, 161.35, 181.94.

**14, Boc-Phe(*N*-Boc)-OMe:** H 1.32 (18H, s, CH3 Boc), 3.85 (3H, s, CH3 OMe), 7.36–7.48 (5H, m, ArH ∆Phe), 7.53 (1H, s, CH); C 27.66, 52.54, 82.98, 127.21, 128.34, 128.92, 129.60, 129.96, 133.04, 135.74, 150.03, 165.40.

**15, Bz-Phe(*N*-Boc)-OMe:** H 1.08 (9H, s, CH3 Boc), 3.86 (3H, s, CH3 OMe), 7.35–7.69 (10H, m, ArH Bz + ArH ∆Phe), 7.84 (1H, s, CH ∆Phe); C 27.18, 52.68, 83.56, 127.65, 127.99, 128.09, 128.75, 129.17, 131.48, 132.88, 136.17, 138.99, 151.45, 164.81, 172,44.

**Boc-∆Phe-OMe:** H 1.37 (9H, s, CH3 Boc), 3.84 (3H, s, CH3 OMe), 6.20 (1H, broad s, NH), 7.26 (1H, s, CH), 7.32–7.56 (5H, m, ArH Phe); C 28.04, 52.56, 80.95, 124.54, 128.46, 129.12, 129.64, 130.02, 134.06, 152.75, 166.05.
